## RESEARCH ARTICLE

# Knowledge, attitude, practice towards COVID-19 pandemic and its prevalence among hospital visitors at Ataye district hospital, Northeast Ethiopia

Daniel Gebretsadik<sup>1\*</sup>, Nuru Ahmed<sup>2</sup>, Edosa Kebede<sup>1</sup>, Saba Gebremicheal<sup>1</sup>, Melaku Ashagrie Belete<sup>1</sup>, Metadel Adane<sup>3</sup>

**1** Department of Medical Laboratory Science, College of Medicine and Health Sciences, Wollo University, Dessie, Ethiopia, **2** Medical Laboratory Department, Ataye District Hospital, Ataye, Northeast Ethiopia, **3** Department of Environmental Health, College of Medicine and Health Sciences, Wollo University, Dessie, Ethiopia

\* [gebretsadikd@gmail.com](mailto:gebretsadikd@gmail.com)

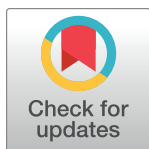

## OPEN ACCESS

**Citation:** Gebretsadik D, Ahmed N, Kebede E, Gebremicheal S, Belete MA, Adane M (2021) Knowledge, attitude, practice towards COVID-19 pandemic and its prevalence among hospital visitors at Ataye district hospital, Northeast Ethiopia. PLoS ONE 16(2): e0246154. <https://doi.org/10.1371/journal.pone.0246154>

**Editor:** Itamar Ashkenazi, Technion - Israel Institute of Technology, ISRAEL

**Received:** October 27, 2020

**Accepted:** January 15, 2021

**Published:** February 19, 2021

**Peer Review History:** PLOS recognizes the benefits of transparency in the peer review process; therefore, we enable the publication of all of the content of peer review and author responses alongside final, published articles. The editorial history of this article is available here: <https://doi.org/10.1371/journal.pone.0246154>

**Copyright:** © 2021 Gebretsadik et al. This is an open access article distributed under the terms of the [Creative Commons Attribution License](https://creativecommons.org/licenses/by/4.0/), which permits unrestricted use, distribution, and reproduction in any medium, provided the original author and source are credited.

**Data Availability Statement:** All relevant data are within the manuscript and its [Supporting information files](#).

## Abstract

### Background

Coronavirus disease 19 (COVID-19) is currently a global health threat and public health emergency of international concern. Africa is the last continent to be hit by this pandemic and the population is still prone to misconceptions and may not take it seriously. In developing countries including Ethiopia, where trained human resources and equipment for the treatment of COVID-19 are scarce, working on prevention of the viral spread should be a priority as a feasible intervention strategy. The aim of this study was to determine the level of knowledge, attitude, practice (KAP) towards COVID-19 and its prevalence among hospital visitors.

### Methods

Health institution based cross sectional study was conducted among 513 hospital visitors who are recruited by using simple random sampling technique at Ataye district hospital, Northeast Ethiopia from June 3, 2020 to August 10, 2020. A pre-tested structured questionnaire was used to obtain information related to socio-demographic characteristics, knowledge (11 questions), attitude (9 questions) and practice (9 questions). Oro-pharyngeal specimen was collected by trained healthcare provider and processed in a molecular laboratory. After extraction of viral nucleic acid, the Real-time fluorescent polymerase chain reaction (RT-PCR) kit was used for detecting novel coronavirus (2019-nCoV). Data was analyzed using bi-variable and multivariable logistic regression model with 95% CI (confidence interval). From the bi-variable analysis, variables having a *P*-value <0.25 were retained into multivariable analysis. From the multivariable analysis, variables with a *P*-value <0.05 was declared as associated factors.

**Funding:** The author(s) received no specific funding for this work.

**Competing interests:** The authors have declared that no competing interests exist.

**Abbreviations:** AOR, Adjusted odds ratio; CI, Confidence interval; COR, Crude odds ratio; COVID-19, Corona-Virus Disease 19; KAP, Knowledge, Attitude, Practice; WHO, World Health Organization.

## Results

Majority (72.9%) of the study participants were male; and most were urban dwellers. From the total study participants, 17 (3.3%) were found to be infected with the virus. The magnitude of low-level of knowledge was 4.9%; and of the analyzed risk factors, female gender, age (category less than 16 years and category between 16 and 65 years), and usual alcohol drinking habit had statistically significant association with low level knowledge. The proportion of study participants who had low level of practice was 75/513 (14.62%). Family size, age category between 16 and 65 years, and low-level knowledge were associated with low-level practice.

## Conclusion

Limited number of study participants had high-level knowledge and practice towards COVID-19; while majority of the study candidates demonstrated moderate level of knowledge and practice. Good knowledge, positive attitude and good practice can be a guarantee for the prevention and control of COVID-19. Hence, various measurements to combat the pandemic should be taken by different stakeholders including the community members, religious leader, health professionals and others.

## Introduction

The novel coronavirus also referred to as severe acute respiratory syndrome coronavirus-2 (SARS-CoV-2) is a single-strand, positive-sense ribonucleic acid (RNA) virus, causes a severe respiratory disease known as coronavirus disease 19 (COVID-19) [1]. The outbreak of COVID-19 was first begun in Wuhan, Hubei state of China and was first reported by the World Health Organization (WHO) on the 31st December 2019 and announced as a global pandemic on 30th January 2020 [2].

Available evidences have indicated that the major route of transmission of COVID-19 is droplet and close contact [3, 4]. The predominant ways of exposure are contact with contaminated surfaces, hands, and touching of faces, eye, nose and mouth. The SARS-CoV-2 causes disease of mild respiratory illness to severe complications characterized by acute respiratory distress syndrome, septic shock, and other metabolic disorders and death [5, 6]. Most of the older men with medical co-morbidities like cancer, diabetes, hypertension, lung, heart, and kidney diseases developed fatal cases and severe illnesses like acute respiratory distress syndrome (ARDS) [7–9]. The symptoms of COVID-19 include fever, fatigue, cough, sore throat, breathing difficulty, myalgia, nausea, vomiting, and diarrhea [3, 10–13].

COVID-19 is currently a global health threat and public health emergency of international concern. The infection has outreached almost all over the world where the total confirmed number of cases is over 37 million and over 1 million deaths have been reported globally due to COVID-19 until October 11, 2020 [14]. Africa is the last continent to be hit by this pandemic; however, it is expected to be the most vulnerable continent where COVID-19 spreading will have a major impact [15]. The first confirmed case of COVID-19 in Africa continent was reported in Egypt on 14<sup>th</sup> of February, 2020, and then in Nigeria on 27<sup>th</sup> of February, in an Italian passenger who flew to Nigeria from Italy on 25<sup>th</sup> of February, 2020 [16]. Ethiopia has become among the COVID-19 affected countries as of March 13, 2020, the date on which one

imported case was first detected [17]. According to the WHO, the number of confirmed cases in Ethiopia reached 89,860 and 1365 deaths as of 20 October 2020 [18].

COVID-19 has no definitive therapy yet, however, the search for vaccines and therapeutic agents against the virus is underway in many parts of the world. Early recognition of symptoms and timely seeking of supportive care and preventive practices enhance recovery from the illness and combat the spread of the virus [19–23].

In a developing country like Ethiopia, where trained human resources and equipment for the treatment of COVID-19 are scarce, working on prevention of the viral spread should be a priority and feasible intervention [24]. Assessing the KAP related to COVID-19 among the general public would be paramount important to mitigate the pandemic by increasing the probability of practicing avoidance of contact with contaminated surfaces /hands/ objects, washing of hands, keeping physical distances, taking precautions while coughing/sneezing, using an alcohol-based rub and other protective equipment. It is also helpful to provide baseline information to determine the type of intervention that may be required to change misconceptions about the virus.

Knowledge and attitude of the community about COVID-19 and practice of its preventive measures have to be optimum for successful implementation of preventive measures. However, the level of knowledge, attitude and practice of the people is not well understood. Thus, the aim of this study was to identify the level of knowledge, attitude and practice towards COVID-19 among hospital visitors in Ataye district hospital, Northeast Ethiopia.

## Materials and methods

### Study design, area and period

This health facility based cross sectional study was conducted at Ataye district hospital, North-east Ethiopia from June 3, 2020 to August 10, 2020. Ataye is a highly populated city found in Amhara Regional State. It is located at an elevation of 1468 meters above sea level. Ataye district is one of the 22 districts found in Northern Shoa around 280 km away from Addis Ababa which is the capital city of Ethiopia. The hospital provides health care service for about 79,000 individuals in the previous year and its catchment area includes Afar regional state, Amhara regional state and special zone of Oromia region. The hospital provides different health care services and comprises of various departments like Laboratory, TB clinic, ART clinic, adult OPD, Inpatients wards, surgery, emergency and other services. During the COVID-19 outbreak period, the hospital is playing a pivotal role on the control and prevention activities.

### Source and study populations

All patients who were visiting the hospital for any health care service at Ataye district hospital were considered as the source population, whereas all hospital visitors with different disease problems who attended the hospital for any health care service during the study period were the study population.

### Eligibility criteria

All hospital visitors of all ages who were willing to provide clinical specimen for COVID-19 testing were eligible for the study. Those hospital visitors who were severely ill and who were not willing to provide their KAP related information towards COVID-19 were excluded from the study.

**Sample size determination and sampling technique.** A single population proportion formula was used to estimate sample size by considering 95% confidence interval ( $Z_{\alpha/2} = 1.96$ ),

5% margin of error; and 50% proportion in order to get the maximum sample size estimate.

$$n = \frac{(Z_{\alpha/2})^2 P(1-P)}{d^2} = 384$$

The calculated sample size was 384, but in order to compensate the non-response rate and to minimize errors due to data collection, it was decided to consider an additional 10% of the calculated sample size. The final calculated sample size became 423 but we recruited a total of 513 subjects in to the study. Simple random sampling technique was applied in order to obtain sufficient number of study participants among hospital visitors at Ataye district hospital during the study period.

### Questionnaire based data collection

A pre-tested structured questionnaire was used to obtain information of the study participants related to socio-demographic characteristics, clinical and risk factor data. The questionnaire assessing knowledge (11 questions) were answered on a true/false basis. A correct answer was assigned 1 point and an incorrect answer was assigned 0 point. The total knowledge score ranged from 0 to 11. Participants' overall knowledge was categorized, using Bloom's cut-off point, as good if the score was between 80 and 100% (8.8–11 points), moderate if the score was between 60 and 79% (6.6–8.69 points), and poor if the score was less than 60% (<6.6 points) [25]. Similarly, the questions assessing practice (9 questions) were answered yes or no, the correct answer was assigned 1 point and an incorrect answer was assigned 0 point. The overall practice score was categorized using the same Bloom's cut-off point, as good if the score was between 80 and 100%, moderate if the score was between 60 and 79% points and poor if the score was less than 60%. Attitude or perception of participants towards COVID-19 was assessed using 9 different questions.

### Specimen collection

Oro-pharyngeal specimen was collected using sterile cotton swab and placed (dipped) immediately into pre-labeled (date, time and identification code), leak-proof, sterile, screw-caped plastic transport tube containing 2-3ml Viral Transport Medium (VTM) by trained healthcare provider following proper infection control strategies and using recommended personal protective equipment (PPE).

### Specimen packaging, storage and transportation

The collected specimens were placed in tube rack and stored in cold box which ensures 2–8°C maintaining triple packaging procedure. The properly packaged oro-pharyngeal specimens were then transported to Debre-Birhan referral hospital. When there is likely to be unavoidable delay in specimens being tested in the laboratory, specimens were kept refrigerated at 2–8°C until being processed.

### Extraction of viral nucleic acid

About 200µl of the collected oropharyngeal specimen was mixed with prepared lysis working solution and proteinase K in 1.5ml sterile centrifuge tube in order to quickly dissolve protein and make nucleic acid dissociated. Then dissociated nucleic acid compositions combined on the silicone membrane of spin column after the addition of ethyl alcohol. Inhibitor remover and deionized solution added to remove the protein, inorganic salt ions and many organic impurities in a cascade of washing and centrifugation steps, then eluent added to elute pure

nucleic acid. The final pure nucleic acid solution was immediately processed for viral detection and the rest was preserved by storing at  $-20^{\circ}\text{C}$  incase repeating test would be necessary [26].

### Detection and amplification

The Real-time fluorescent polymerase chain reaction (RT-PCR) kit was used for detecting novel coronavirus (2019-nCoV). It is based on a qualitative *in vitro* nucleic acid amplification assay intended to detect ORF1ab gene of 2019-nCoV using reverse transcription PCR combining fluorescent probing. Primers and sequence-specific fluorescence probes were designed tailored to high conservative region in 2019-nCoV genome. The probes were oligo-nucleotide attached fluorophores at the 5' end with FAM as reporter and 3' end with quencher. The kit contents thawed thoroughly at ambient temperature except the enzyme mix. About 20ul PCR-mix ingredients (master mix) were prepared and mixed with 10ul of previously extracted nucleic acid solution in the 96-well PCR plates, the plate was then loaded in to RT-PCR machine and an automatic process completes the remaining assay steps [27].

### Quality assurance

Prior to the actual data collection, the questionnaire was tested on 5% of the total sample size (513) on 26 patients visiting the nearby Kemissie health center, which provides similar services as Ataye district hospital to check the validity of data collection tool. After pre-test was done, the questionnaire was revised and amended. To generate quality and reliable data, all quality control checks were done in the whole data collection process. Specimen collection, handling and transportation protocols, and other special safety precautions were provided with the necessary job aids for the facilities under study to monitor their process quality. Moreover, Standard Operating Procedures (SOPs) were strictly followed through all aspects of data collection including specimen collection, handling, testing and infection control strategies. No Template Control (NTC) which was composed of nuclease-free water was included in each run to monitor reagent and system contamination during RNA extraction process.

Negative and positive control were used for every run to verify that sample processing, amplification, and detection steps were performed correctly. To prevent contamination, the sample preparation (BSC II, type A2) and amplification instruments were cleaned regularly based on the decontamination and cleaning protocol found within the operator manual. The data from the standardized checklist was checked for its completeness and accuracy.

### Statistical analysis

Data was entered to Microsoft excel and exported to SPSS version 20 software (IBM, USA), and analyzed. Descriptive statistic such as frequencies and percentages were calculated for categorical variables and mean with standard deviations for continuous variable (age) to examine the overall distribution. Based on positive results, the prevalence of COVID-19 among Ataye district hospital visitors was estimated by dividing the number of COVID-19 positive test results by the total study participants.

Data was analyzed using binary logistic regression model with 95% confidence interval (CI). A bi-variable logistic regression analysis (Crude Odds Ratio [COR]) and multivariable logistic regression analysis (Adjusted odds ratio [AOR]) were employed to identify factors associated with prevalence of COVID-19 infection, low level of knowledge and low-level of preventive practices. From the bi-variable logistic regression analysis, variables with a P-value  $< 0.25$  was considered for multivariable logistic regression analysis. From the multivariable analysis, variables with a P-value  $< 0.05$  were taken as statistically significant. The presence of multi-collinearity among independent variables was checked using standard error and



we found no multi-collinearity. Model fitness was also checked using the Hosmer Lemeshow test and the model was fit.

### Ethical considerations

Ethical clearance was obtained from institutional ethical review committee College of Medicine and Health Science, Wollo University. Additionally official permission letter was secured from Ataye district hospital using the cooperation letter from Wollo University. After briefly explaining the importance, purpose and procedure of the study, a written consent was obtained from study participants. For those participants below the age of 18 years, parental or legal guardian's consent was obtained before data collection.

## Results

### Socio-demographic and clinical characteristics of the study participants

A total of 513 study participants were included in this study and about 304 (59.3%) of them were in the age category of 16 to 65 yrs. Majority (72.9%) of the study participants were male, half of them had family size greater than 6 members; and most of the study participants live in the urban area of the town. More than half of the study participants know their current HIV status and about 47% of them have known chronic diseases. About 36% and 53% of the study participants had cigarette smoking and usual alcohol drinking habit, respectively (Table 1).

### Knowledge of study participants on COVID-19

In this study, more than half (56.1%) of participants responded that fever, cough, shortness of breath, sore throat and muscle pain are not the main clinical symptoms of COVID-19. Significant number of the study participants, 212 (41.3%), answered that COVID-19 viral infection cannot present on any individual without symptoms. Most study participants, 486 (94.7%), responded individuals should avoid going to crowded places such as market place and avoid taking public transportations in order to prevent COVID-19 infection (Table 2).

### Attitude of study participants towards COVID-19

Most study participants perceived that they are following the latest information about the case definition of COVID-19, the health care facility in their locality and they are prepared for the management of the disease. About 486 (94.7%) of the study participants believe that the measures taken by Ethiopian Ministry of Health is helpful in combating COVID-19 outbreak. The number of study participants who believe exposing themselves to the sun or higher temperature and eating of garlic as helpful measure for the prevention of the outbreak is not insignificant. Higher number of study participants did not have confidence that Ethiopia can win the battle against the COVID-19 virus prevention and control (Table 3).

### Practices of study participants towards COVID-19 prevention and control

Most of the study participants, 485 (94.5%), have gone to crowded places recently. Among the total participants 81 (15.8%) were having history of touching others for greeting. Moreover, nearly half of them, 266 (51.9%), did not have the practice of washing their hands with soap after touching anything or anyone (Table 4).

In this study, awareness about the symptoms of COVID-19 were assessed among those with known chronic disease 241 (47%) and those without chronic disease. Out of the symptoms, shortness of breath was mentioned by 211 study participants. The second most

Table 1. Socio-demographic and clinical characteristics of the study participants on KAP about COVID-19 among hospital visitors at Ataye district hospital, 2020.

| S.no. | Characteristics                  | Frequency | Percentage |
|-------|----------------------------------|-----------|------------|
| 1.    | Age (years)                      |           |            |
|       | <16                              | 106       | 20.7       |
|       | 16–65                            | 304       | 59.3       |
|       | >65                              | 103       | 20.1       |
| 2.    | Gender (Sex)                     |           |            |
|       | Male                             | 374       | 72.9       |
|       | Female                           | 139       | 27.1       |
| 3.    | Number of family                 |           |            |
|       | 1–3                              | 92        | 17.9       |
|       | 4–6                              | 163       | 31.8       |
|       | >6                               | 258       | 50.3       |
| 4.    | Residence                        |           |            |
|       | Rural                            | 70        | 13.6       |
|       | Urban                            | 443       | 86.4       |
| 5.    | Educational status               |           |            |
|       | Illiterate                       | 20        | 3.9        |
|       | Primary school                   | 90        | 17.5       |
|       | Secondary school                 | 104       | 20.3       |
|       | College and above                | 299       | 58.3       |
| 6.    | Occupation                       |           |            |
|       | Merchant                         | 168       | 32.7       |
|       | Student                          | 112       | 21.8       |
|       | Governmental employee            | 39        | 7.6        |
|       | Private employee                 | 53        | 10.3       |
|       | Daily labor                      | 135       | 26.3       |
|       | Others                           | 6         | 1.17       |
| 7.    | Contact history with known cases |           |            |
|       | No                               | 345       | 67.3       |
|       | Yes                              | 168       | 32.7       |
| 8.    | Travel history                   |           |            |
|       | No                               | 420       | 81.9       |
|       | Yes                              | 93        | 18.1       |
| 9.    | Know current HIV/AIDS status     |           |            |
|       | No                               | 217       | 42.3       |
|       | Yes                              | 296       | 57.7       |
| 10.   | Have known chronic disease       |           |            |
|       | No                               | 272       | 53         |
|       | Yes                              | 241       | 47         |
| 11.   | Habit of smoking Cigarette       |           |            |
|       | No                               | 325       | 63.4       |
|       | Yes                              | 188       | 36.6       |
| 12.   | Habit of usual alcohol drinking  |           |            |
|       | No                               | 241       | 47         |
|       | Yes                              | 272       | 53         |

<https://doi.org/10.1371/journal.pone.0246154.t001>

**Table 2. Knowledge of the study participants towards COVID-19 among hospital visitors at Ataye district hospital, 2020.**

| S. no. | Knowledge questions                                                                                                                                                       | Correct    | Incorrect  |
|--------|---------------------------------------------------------------------------------------------------------------------------------------------------------------------------|------------|------------|
|        |                                                                                                                                                                           | n (%)      | n (%)      |
| 1      | Main clinical symptoms of COVID-19 are fever, cough, shortness of breath, sore throat and fatigue (muscle or joint pain)                                                  | 124 (24.2) | 389 (75.8) |
| 2      | Currently, there is no effective treatment or vaccine for COVID-2019, but early symptomatic and supportive treatment can help most patients to recover from the infection | 502 (97.9) | 11 (2.14)  |
| 3      | Not all persons with COVID-2019 will develop to severe cases. Only those who are elderly, obese and who have chronic illnesses are more likely to be severe cases         | 501 (97.7) | 12 (2.3)   |
| 4      | Individuals with COVID-2019 cannot transmit the virus to others when a fever is not present                                                                               | 25 (4.9)   | 488 (95.1) |
| 5      | The COVID-19 virus spreads via respiratory droplets of infected individuals                                                                                               | 500 (97.5) | 13 (2.5)   |
| 6      | It is not necessary for children and young adults to take measures to prevent the infection by the COVID-19 virus                                                         | 25 (4.9)   | 488 (95.1) |
| 7      | To prevent the infection by COVID-19, individuals should avoid going to crowded places such as market place and avoid using public transportations.                       | 486 (94.7) | 27 (5.3)   |
| 8      | Isolation and treatment of people who are infected with the COVID-19 virus are effective ways to reduce the spread of the virus.                                          | 488 (95.1) | 25 (4.9)   |
| 9      | People who have contact with someone infected with the COVID-19 virus should be immediately isolated in a proper place and observed for 14 days                           | 486 (94.7) | 27 (5.3)   |
| 10     | Do you know where and how to report a potential 2019-nCoV case or exposure?                                                                                               | 503 (98.1) | 10 (1.9)   |
| 11     | The COVID-19 viral infection may present on any individual with no symptoms                                                                                               | 301 (58.7) | 212 (41.3) |

<https://doi.org/10.1371/journal.pone.0246154.t002>

**Table 3. Attitude of the study participants towards COVID-19 among hospital visitors at Ataye district hospital, 2020.**

| S. no. | Attitude questions                                                                                                     | Yes        | No         |
|--------|------------------------------------------------------------------------------------------------------------------------|------------|------------|
|        |                                                                                                                        | n (%)      | n (%)      |
| 1      | Do you feel that you keep yourself up to date on the latest information about case definitions of 2019-nCoV infection? | 478 (93.2) | 35 (6.8)   |
| 2      | Do you consider yourself prepared for the management of the 2019-nCoV outbreak?                                        | 495 (96.5) | 18 (3.5)   |
| 3      | Do you consider your health care facility is prepared for the management of the 2019-nCoV outbreak?                    | 473 (92.2) | 40 (7.8)   |
| 4      | Do you feel the measures taken by Ethiopian Ministry of Health are helpful in combating COVID-19 outbreak?             | 486 (94.7) | 27 (5.3)   |
| 5      | In your opinion does exposing yourself to the sun or to temperatures higher than 25°C prevent the coronavirus disease? | 46 (9)     | 467 (91)   |
| 6      | Do you feel that eating garlic help prevent infection with the new coronavirus?                                        | 33 (6.4)   | 480 (93.6) |
| 7      | Do you perceive that the new coronavirus do not affect younger people?                                                 | 65 (12.7)  | 448 (87.3) |
| 8      | Do you have confidence that Ethiopia can win the battle against the COVID-19 virus?                                    | 37 (7.2)   | 476 (92.8) |
| 9      | If you develop the sign and symptom of COVID-19, do you think that you will go to the quarantine center?               | 413 (80.5) | 100 (19.5) |

<https://doi.org/10.1371/journal.pone.0246154.t003>



**Table 4. Practice of the study participants towards COVID-19 among hospital visitors at Ataye district hospital, 2020.**

| S. no. | Practice questions                                                                                          | Yes        | No         |
|--------|-------------------------------------------------------------------------------------------------------------|------------|------------|
|        |                                                                                                             | n (%)      | n (%)      |
| 1      | In recent days, have you gone to any crowded place?                                                         | 485 (94.5) | 28 (5.5)   |
| 2      | In recent days, have you worn a mask when leaving home?                                                     | 492 (95.9) | 21 (4.1)   |
| 3      | In recent days, have you touched your mouth, nose, and eye frequently?                                      | 380 (74.1) | 133 (25.9) |
| 4      | When you get in your home/friend home/ family home/ working area, did you touch any one there for greeting? | 81 (15.8)  | 432 (84.2) |
| 5      | Do you cover your nose and mouth with a tissue during sneezing or coughing?                                 | 494 (96.3) | 19 (3.7)   |
| 6      | Do you use soap or hand sanitizer to wash your hands continuously?                                          | 480 (93.6) | 33 (6.4)   |
| 7      | Did you frequently wash your hand with soap or other detergents after you touch anything or anyone?         | 247 (48.1) | 266 (51.9) |
| 8      | Did you close the water pipe safely after you finish washing your hand to avoid recontamination?            | 321 (62.6) | 192 (37.4) |
| 9      | Did you practice “physical distancing” by staying 2 meters away from others at all times?                   | 468 (91.2) | 45 (8.8)   |

<https://doi.org/10.1371/journal.pone.0246154.t004>

mentioned symptom was fever which is reported by 170 participants. Whereas red eyes and development of rash were the two less frequently revealed answers (Fig 1).

### Prevalence of COVID-19 and associated factors

From the total study participants, 17 (3.3%) were found to be infected with the virus and 13 (2.5%) were males. Majority of study participants with a positive test result had no travel history, habit of smoking cigarette and habit of usual alcohol drinking. More than seven characteristics have been checked for the presence or absence of association with the laboratory test result of COVID-19, but none of these variables had association with the dependent variable (Table 5).

### Low level of knowledge and its associated factors towards COVID-19

About 4.9% (25/513) study participants had low level of knowledge about the transmission, prevention and control of COVID-19 pandemic. Majority of study participants who had low

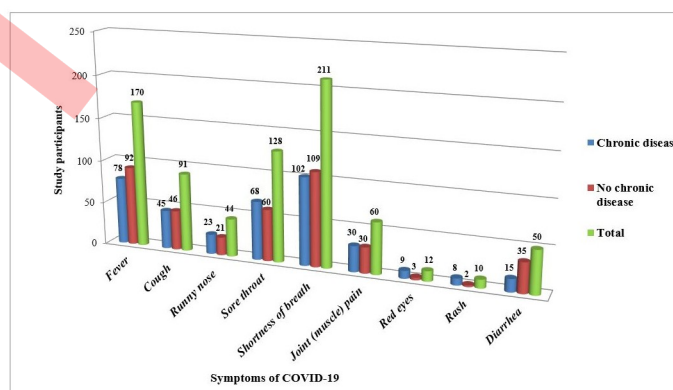**Fig 1. Awareness of study participants towards symptoms of COVID-19, 2020.**

<https://doi.org/10.1371/journal.pone.0246154.g001>

Table 5. Bivariable and multivariable logistic regression analyses on factors associated with prevalence of COVID-19 among hospital visitors in Ataye district hospital, Northeast Ethiopia, 2020 (N = 513).

| Parameter                     | Test results |            | COR [95%CI]       | P-value | AOR [95%CI]       | P-value |
|-------------------------------|--------------|------------|-------------------|---------|-------------------|---------|
|                               | Positive     | Negative   |                   |         |                   |         |
| Age (Years)                   |              |            |                   |         |                   |         |
| <16                           | 6 (35.3)     | 100 (20.2) | 0.97 [0.3–3.1]    | 0.96    | 0.92 [0.28–3.1]   | 0.89    |
| 16–65                         | 5 (29.4)     | 299 (60.3) | 0.27 [0.08–0.91]  | 0.034   | 0.2 [0.02–1.85]   | 0.16    |
| >65                           | 6 (35.3)     | 97 (19.6)  | 1                 |         | 1                 |         |
| Sex                           |              |            |                   |         |                   |         |
| Male                          | 13 (76.5)    | 361 (72.8) | 1.2 [0.39–3.79]   | 0.74    |                   |         |
| Female                        | 4 (23.5)     | 135 (27.2) | 1                 |         | NA                | NA      |
| History of travel             |              |            |                   |         |                   |         |
| No                            | 16 (94.1)    | 404 (81.5) | 1                 | 0.21    | 1                 | 0.96    |
| Yes                           | 1 (5.9)      | 92 (18.5)  | 0.27 [0.04–2.1]   |         | 0.94 [0.06–14.3]  |         |
| Smoking                       |              |            |                   |         |                   |         |
| No                            | 14 (82.4)    | 311 (62.7) | 1                 |         | 1                 | 0.267   |
| Yes                           | 3 (17.6)     | 185 (37.3) | 0.36 [0.1–1.27]   | 0.11    | 0.28 [0.03–2.67]  |         |
| Usual alcohol drinking        |              |            |                   |         |                   |         |
| No                            | 11 (64.7)    | 230 (46.4) | 1                 | 0.14    | 1                 | 0.54    |
| Yes                           | 6 (35.3)     | 266 (53.6) | 0.47 [0.17–1.3]   |         | 2.17 [0.18–26.2]  |         |
| Contact History               |              |            |                   |         |                   |         |
| No                            | 13 (76.5)    | 332 (66.9) | 1                 |         |                   |         |
| Yes                           | 4 (23.5)     | 164 (33.1) | 0.6 [0.2–1.94]    | 0.41    | NA                | NA      |
| Know HIV status               |              |            |                   |         |                   |         |
| No                            | 8 (47.1)     | 209 (42.1) | 1                 |         |                   |         |
| Yes                           | 9 (52.9)     | 287 (57.9) | 0.82 [0.3–2.16]   | 0.69    | NA                | NA      |
| Having Known chronic diseases |              |            |                   |         |                   |         |
| No                            | 9 (52.9)     | 263 (53)   | 1                 | 0.995   |                   |         |
| Yes                           | 8 (47.1)     | 233 (47)   | 1.003 [0.38–2.64] |         | NA                | NA      |
| Practice                      |              |            |                   |         |                   |         |
| High                          | 6 (4.9)      | 116 (95.1) | 3.83 [0.45–32.4]  | 0.22    | 3.23 [0.34–30.5]  | 0.306   |
| Moderate                      | 10 (3.2)     | 306 (96.8) | 2.42 [0.31–19.2]  | 0.4     | 1.95 [0.22–17.59] | 0.552   |
| Low                           | 1 (1.3)      | 74 (98.7)  | 1                 |         | 1                 |         |

Note: AOR, adjusted odds ratio; COR, crude odds ratio; 1, reference category; 95% CI, 95% confidence interval; NA, not applicable to multivariable analysis due to the bi-variable analysis p-value > 0.25

<https://doi.org/10.1371/journal.pone.0246154.t005>

level of knowledge about the pandemic were living with a family size greater than 6. Female study participants had 32 times odds of having low level of knowledge in comparison with their male counterparts (AOR = 32, 95%CI: 7.66, 133.7,  $P < 0.001$ ). Although it was not supported by statistical association, considerable numbers of study participants who had contact with known cases and who did not have travel history had low level of knowledge. Study participants with age category of <16 years (AOR = 0.01, 95%CI: 0.001, 0.10,  $P = 0.001$ ) and between 16 and 65 years (AOR = 0.15, 95% CI: 0.02, 0.92,  $P = 0.04$ ) had a reciprocal likelihood association with low knowledge level in reference to study participants categorized under >65 years of age. Those study participants who had usual habit of alcohol drinking showed more than 23 times odds of having low level of knowledge in comparison with their counterpart (Table 6).

**Table 6. Bi-variable and multivariable logistic regression analyses on factors associated with low level of knowledge towards COVID-19 among hospital visitors in, Ataye district hospital, Northeast Ethiopia, 2020 (N = 513).**

| Parameter                        | Low knowledge level |            | COR [95%CI]       | P-value | AOR [95%CI]       | P-value |
|----------------------------------|---------------------|------------|-------------------|---------|-------------------|---------|
|                                  | Yes                 | No         |                   |         |                   |         |
| Number of family                 |                     |            |                   |         |                   |         |
| 1–3                              | 5 (20)              | 87 (17.8)  | 0.77 [0.28–2.13]  | 0.61    | 1.35 [0.18–9.86]  | 0.770   |
| 4–6                              | 2 (8)               | 161 (33)   | 0.17 [0.04–0.72]  | 0.017   | 0.997 [0.1–10.26] | 0.998   |
| >6                               | 18 (72)             | 240 (49.2) | 1                 |         | 1                 |         |
| Age (years)                      |                     |            |                   |         |                   |         |
| <16                              | 1 (4)               | 105 (21.5) | 0.045 [0.01–0.34] | 0.003   | 0.01 [0.001–0.1]  | <0.001* |
| 16–65                            | 6 (24)              | 298 (61.1) | 0.1 [0.04–0.25]   | <0.001  | 0.15 [0.02–0.92]  | 0.040*  |
| >65                              | 18 (72)             | 85 (17.4)  | 1                 |         | 1                 |         |
| Sex                              |                     |            |                   |         |                   |         |
| Male                             | 5 (20)              | 369 (75.6) | 1                 | <0.001  | 1                 | <0.001* |
| Female                           | 20 (80)             | 119 (24.4) | 12.4 [4.56–33.77] |         | 32 [7.66–133.7]   |         |
| Residence                        |                     |            |                   |         |                   |         |
| Rural                            | 2 (8)               | 68 (13.9)  | 1                 |         |                   |         |
| Urban                            | 23 (92)             | 420 (86.1) | 1.86 [0.43–8.1]   | 0.41    | NA                | NA      |
| Contact history with known cases |                     |            |                   |         |                   |         |
| No                               | 8 (32)              | 337 (69.1) | 1                 |         | 1                 |         |
| Yes                              | 17 (68)             | 151 (30.9) | 4.74 [2.0–11.23]  | <0.001  | 0.74 [0.1–5.46]   | 0.769   |
| History of travel                |                     |            |                   |         |                   |         |
| No                               | 22 (88)             | 398 (81.6) | 1                 | 0.42    |                   |         |
| Yes                              | 3 (12)              | 90 (18.4)  | 0.6 [0.18–2.06]   |         | NA                | NA      |
| Smoking                          |                     |            |                   |         |                   |         |
| No                               | 24 (96)             | 301 (61.7) | 1                 | 0.008   | 1                 | 0.66    |
| Yes                              | 1 (4)               | 187 (38.3) | 0.07 [0.01–0.5]   |         | 2.06 [0.08–52.57] |         |
| Usual alcohol drinking           |                     |            |                   |         |                   |         |
| No                               | 24 (96)             | 217 (44.5) | 1                 | 0.001   | 1                 | .       |
| Yes                              | 1 (4)               | 271 (55.5) | 0.03 [0.004–0.25] |         | 23.66 [1.13–497]  | 0.042*  |
| Know HIV status                  |                     |            |                   |         |                   |         |
| No                               | 21 (84)             | 196 (40.2) | 1                 | <0.001  | 1                 | .       |
| Yes                              | 4 (16)              | 292 (59.8) | 0.13 [0.04–0.38]  |         | 0.45 [0.07–2.69]  | 0.379   |

Note:

\*Statistically significant at  $P < 0.05$ .AOR, adjusted odds ratio; COR, crude odds ratio; 1, reference category; 95% CI, 95% confidence interval; NA, not applicable to multivariable analysis due to the bi-variable analysis p-value  $> 0.25$ <https://doi.org/10.1371/journal.pone.0246154.t006>

### Low level of practice and its associated factors towards COVID-19

The proportion of study participants who had low level of practice towards the prevention and control of COVID-19 pandemic was 14.62% (75/513). Study participants who had 1–3 family members had more than five times the likelihood of having low practice level towards the control and prevention of the pandemic in comparison with study participants who had greater than 6 family members (AOR = 5.84, 95%CI: 2.29, 14.9,  $P < 0.001$ ). Study participants in the age category between 16 and 65 years were 35 times more likely to have poor practice compared to those study participants who were older than 65 years (AOR = 35.4, 95%CI: 9.48, 132.2,  $P < 0.001$ ). Low level knowledge and cigarette smoking habit showed a positive (exposing) statistically significant association with poor level of practice whereas gender of study

**Table 7. Bi-variable and multivariable logistic regression analyses on factors associated with low level of practice towards COVID-19 among hospital visitors in, Ataye district hospital, Northeast Ethiopia, 2020 (N = 513).**

| Parameter                         | Low Practice level |            | COR [95%CI]       | P-value | AOR [95%CI]        | P-value |
|-----------------------------------|--------------------|------------|-------------------|---------|--------------------|---------|
|                                   | Yes                | No         |                   |         |                    |         |
| Number of family                  |                    |            |                   |         |                    |         |
| 1–3                               | 37 (49.3)          | 55 (12.6)  | 5.3 [3.01–9.38]   | <0.001  | 5.84 [2.29–14.9]   | <0.001* |
| 4–6                               | 9 (12)             | 154 (35.2) | 0.46 [0.21–1.002] | 0.051   | 0.4 [0.14–1.2]     | 0.102   |
| >6                                | 29 (38.7)          | 229 (52.3) | 1                 |         | 1                  |         |
| Age (years)                       |                    |            |                   |         |                    |         |
| <16                               | 1 (1.3)            | 105 (24)   | 0.04 [0.01–0.28]  | 0.001   | 0.19 [0.02–1.83]   | 0.15    |
| 16–65                             | 53 (70.7)          | 251 (57.3) | 0.82 [0.47–1.45]  | 0.502   | 35.4 [9.48–132.2]  | <0.001* |
| >65                               | 21 (28)            | 82 (18.7)  | 1                 |         | 1                  |         |
| Sex                               |                    |            |                   |         |                    |         |
| Male                              | 38 (50.7)          | 336 (76.7) | 1                 | <0.001  | 1                  |         |
| Female                            | 37 (49.3)          | 102 (23.3) | 3.21 [1.94–5.31]  |         | 2.17 [0.87–5.42]   | 0.096   |
| Contact history with known cases  |                    |            |                   |         |                    |         |
| No                                | 51 (68)            | 294 (67.1) | 1                 | 0.881   |                    |         |
| Yes                               | 24 (32)            | 144 (32.9) | 0.96 [0.57–1.62]  |         | NA                 | NA      |
| History of travel                 |                    |            |                   |         |                    |         |
| No                                | 67 (89.3)          | 353 (80.6) | 1                 | 0.074   | 1                  | <0.001* |
| Yes                               | 8 (10.7)           | 85 (19.4)  | 0.5 [0.23–1.07]   |         | 0.07 [0.02–0.24]   |         |
| Do you have known chronic disease |                    |            |                   |         |                    |         |
| No                                | 40 (53.3)          | 232 (53)   | 1                 | 0.953   |                    |         |
| Yes                               | 35 (46.7)          | 206 (47)   | 0.99 [0.6–1.6]    |         | NA                 | NA      |
| Smoking cigarette                 |                    |            |                   |         |                    |         |
| No                                | 53 (70.7)          | 272 (62.1) | 1                 | 0.157   | 1                  | 0.001*  |
| Yes                               | 22 (29.3)          | 166 (37.9) | 0.68 [0.4–1.16]   |         | 35.43 [4.5–278.7]  |         |
| Usual alcohol drinking            |                    |            |                   |         |                    |         |
| No                                | 53 (70.7)          | 188 (42.9) | 1                 | <0.001  | 1                  | <0.001* |
| Yes                               | 22 (29.3)          | 250 (57.1) | 0.31 [0.18–0.53]  |         | 0.002 [0.00–0.023] |         |
| Know HIV status                   |                    |            |                   |         |                    |         |
| No                                | 31 (41.3)          | 186 (42.5) | 1                 | 0.85    |                    |         |
| Yes                               | 44 (58.7)          | 252 (57.5) | 1.05 [0.64–1.72]  |         | NA                 | NA      |
| Low level knowledge               |                    |            |                   |         |                    |         |
| No                                | 54 (72)            | 434 (99.1) | 1                 | <0.001  | 1                  | <0.001* |
| Yes                               | 21 (28)            | 4 (0.9)    | 42.2 [14–127.5]   |         | 62.4 [11.2–347.1]  |         |

Note:

\*Statistically significant at  $P < 0.05$ .AOR, adjusted odds ratio; COR, crude odds ratio; 1, reference category; 95% CI, 95% confidence interval; NA, not applicable to multivariable analysis due to the bi-variable analysis  $p\text{-value} > 0.25$ <https://doi.org/10.1371/journal.pone.0246154.t007>

participants did not show any significant association. In another way study participants who had travel history and those who had usual alcohol drinking habit had an inverse statistical association with low level practice towards the prevention and control means of COVID-19 in reference to their counterparts (Table 7).

## Discussion

Assessment of the knowledge, attitude and practice of the population such as vulnerable groups, hospital visitors and community members at large, towards COVID-19 pandemic has

paramount importance. This is because in order to combat the infection, the population should have good knowledge, proper attitude and very high level of practice with regard to the prevention and control measures advocated by the Ministry of Health.

In the current study, only 124 (24.2%) of participants provided correct response to the key clinical symptoms of COVID-19. This was far beyond the study conducted in Ethiopia and Bangladesh, which reported that majority of study participants provided correct response to the question [25, 28]. A study conducted in Egypt indicated that the main clinical manifestations of COVID-19 patients were fever, cough, dyspnea and fatigue with varying proportions [29]. About 58.7% of the study participants reported that any person with no symptoms could have viral infection with COVID-19, but the rest responded that the infection was present only on individuals with symptoms. According to WHO report, many people might develop the infection without showing the common symptoms. As evidence for the above scenario, it is possible to mention a population screening work in Iceland which has shown that about 43% of the participants who tested positive reported having no symptoms [30].

The proportion of study participants who knew the fact that not all individuals with COVID-19 would progress to severe cases in the current study (97.7%) is higher than related study in Jimma, Ethiopia [31]. This fact is supported with a study by Ramadan et al., which showed that 51.5% of COVID-19 patients had moderate, while 25.4% and 23% of them had mild and severe clinical manifestations, respectively [29]. Similarly, during the study period, almost all study participants reported that there is no effective treatment or vaccine for COVID-19, but early symptomatic and supportive treatment can help most patients to recover from the infection.

In agreement with a study done in Bangladeshi [28], few number of the study participants have stated that it is not necessary for children and young adults to take measures to prevent the infection with the COVID-19 virus. But a recent review of the clinical and demographic characteristics of COVID-19 cases in China showed that anyone without age limitation is susceptible to the virus and the pandemic is transmitted from an infected carrier to anyone in close contact without limitation [32]. Even though the figure is not huge, these hospital visitors may have children and they most likely did not take appropriate means of prevention, as a result of which their children could be infected by COVID-19.

In this study, the proportion of low level of knowledge was 4.87% (25/513), while study participants who had high and moderate level of knowledge accounted for 1.17% (6/513) and 93.96% (482/513), respectively. The proportion of low level of knowledge in this study was lower than other studies in Ethiopia [25, 31]. This might be due to the fact that previous studies were conducted early during the pandemic, while the current study was conducted after most of the population obtained information about the infection through a number of ways. The number of study participants who had high level of knowledge is decidedly lower than similar studies in Africa and elsewhere [28, 33–35]. The possible explanation for this discrepancy would be the dissimilarity on the cut off to define knowledge score and also in these research works the study participants could get access to the internet service, which in turn helped them to obtain sufficient information about the pandemic from various sources.

In the present study, majority of the study participants considered themselves prepared for the management of the pandemic; almost all believed that the measures taken by the Ministry of Health-Ethiopia was helpful in combating COVID-19 outbreak; more than 90% of the study participants considered the health care facility near them were prepared for the management of the 2019-nCoV outbreak. But most of them (92.8%) did not believe that Ethiopia can win the battle against the COVID-19 virus, which is in reverse with the attitude of majority of study participants (97.1%) who had confidence that China can win the battle against COVID-19 [34]. Similar to the current study, majority (77%) of study participants in Bangladeshi



perceived that COVID-19 can cause widespread fatality in their country [28]. The pessimistic attitude in our study could be attributed to the poor health system of the country.

One of the most helpful measures towards the control and prevention scheme of COVID-19 transmission is spending time in the quarantine center if members of the population show either the symptoms of COVID-19 or become laboratory confirmed cases [36]. A considerable number of participants, 100 (19.5%), in the current study supposed that they would not go to the quarantine center even if they develop the sign and symptom of the pandemic. On the contrary, one study conducted in the early phase of the pandemic indicated that more than 80% of the participants in Northern Ethiopia knew about the importance of isolation of infected people as a decisive measure for the control of COVID-19 [37].

One of the demographic characteristics that showed statistically significant association with low level of knowledge in the current study was age. In reference to study participants older than 65 years of age, participants in the age category between 16 and 65 years had a reciprocal likelihood association (AOR = 0.15, 95% CI: 0.02, 0.92,  $P = 0.04$ ) with a low level of knowledge. Even though study participants in this age category had good knowledge, the likelihood of their low-level practice is 35 times higher than the reference group. This disparity is consistent with a study done in India to learn the knowledge, attitude and practice towards health behavior [38]. The knowledge and practice disagreement can also be demonstrated among physicians who have high level of knowledge about the bad effects of cigarette smoking, but who practice smoking themselves [39]. Despite the absence of statistical association between study participants whose age category is below 16 years of age and low level of practice, their knowledge-based response regarding COVID-19 indicated that there is an inverse association with low level of knowledge (AOR = 0.01, 95% CI: 0.001, 0.1,  $P < 0.001$ ).

Findings from the current study revealed that female study participants had shown a higher likelihood of having low level of knowledge (AOR = 32, 95% CI: 7.66, 133.7,  $P < 0.001$ ). On the contrary, a comparable knowledge level was reported among males and females from a study conducted in Bangladesh [40] which might be attributable to the presence of good educational support for females in the country. Whereas, like many other developing countries, educational support for females in Ethiopia has not been well developed yet. This might be one of the possible reasons why females had low level of knowledge about COVID-19 in the study area. A study conducted in Amhara region, Ethiopia, showed that the study participants who used social media as information sources were significantly knowledgeable compared to those who did not access information using social media [37]. During the lock down, females in Ethiopia spend their time on preparing food and other home activities, rather than seeking information from different sources. This could be another possible justification for a significantly low level of knowledge among female participants in the current study. In the present study, low-level of knowledge had a significant association with usual alcohol drinking habits among the study participants (AOR = 23.66, 95% CI: 1.13, 497,  $P = 0.042$ ). However, similar studies in Ethiopia did not indicate any statistically significant association between knowledge level and alcohol drinking habit [37].

In the current study, the proportion of study participants who had low level of practice (14.6%) was lower than similar study in Ethiopia [25] and was found to be higher than a study conducted in Iran [41]. Participants with low-level of knowledge about COVID-19 had shown 62 times higher odds of low-level of practice, which is in agreement with a study conducted in Ethiopia [25]. Correspondingly a study in USA has revealed that study participants who obtained more COVID-19-related health information reported more frequent effort to engage in all types of preventive behaviors, such as wearing a facemask in public, washing hands and so on [42]. Few studies conducted elsewhere [42, 43] indicated that male study participants were likely to have low-level pandemic control and prevention practices. Likewise, a study in

Cameroon revealed that women had lower practice scores compared to men [35]. Similar study with the current work did not reveal any association between gender and level of practice towards COVID-19 prevention and control measures of the study participants [25].

In the current study, the overall prevalence of laboratory-confirmed COVID-19 positive hospital visitors was 3.3% (17/513); and its prevalence among study participants who had close contact with suspected cases was 2.4% (4/168). This finding is comparable with the laboratory test result of asymptomatic health care worker study participants who had close contact with suspected cases (4.2%). The slight variation in the prevalence of COVID-19 might be due to the dissimilarity of the study participants in both studies. The overall prevalence of COVID-19 in the current study was very low in comparison with symptomatic health care worker study subjects (80.3%) in a study conducted in China [44]. In comparison with the current study, the prevalence of COVID-19 in the national probability-based sample study conducted in Iceland (0.6%) [30], Luxembourg (0.3%) [45] and Slovenia (0.15%) [46] was lower. This difference in prevalence might be due to variation in the course of study period, population and study subjects.

In the present study, the prevalence of COVID-19 did not associate with any socio-demographic and health behavior parameters of the study participants. The prevalence of the pandemic was more than two-third among those who did not have any travel history (16/17) and among those who had no history of contact with cases (13/17). This might indicate the disease has been disseminated in the community.

## Conclusion

The overall prevalence of COVID-19 among hospital visitors in Ataye district hospital from June 3, 2020 to August 10, 2020 was high and did not associate with any socio-demographic and other characteristics of the study participants. Limited number of study participants had high level of knowledge and practice towards COVID-19, the number of hospital visitors who had low level of knowledge and practice was also few, and majority of the study participants demonstrated a moderate level of knowledge and practice. Independent variables such as age, sex and alcohol drinking habit were significantly associated with low level of knowledge, whereas number of family, age, having history of travel, cigarette smoking and alcohol drinking parameters and having low level of knowledge had either preventive or exposing trend association with poor level of practice. Since only good knowledge, positive attitude and good practice can be a guarantee (a weapon) for the prevention and control of COVID-19 pandemic, the community members, religious leaders, health extension workers, family members, health care stakeholders, and other concerned bodies should work together in order to enhance the knowledge, attitude and practices of the people in the area.

## Limitation of the study

It is a one-time study; thus, it shared the limitations of a cross-sectional study to establish cause-effect relationships. Due to the fear of being called unknowledgeable and mal-practitioner, the study participants may provide socially acceptable answers to the knowledge, attitude and practice questions. Another limitation of this study is the number of health facility that we used to collect data and the specimen is single, it would be good and highly representative if we recruited the study participants from a number of health care providers. Thus, further studies that focused on several hospitals are highly encouraged for providing more representative evidence.

## Supporting information

**S1 Questionnaire. Survey of knowledge, attitude, practice towards COVID-19 pandemic and its prevalence among hospital visitors at Ataye district hospital, Northeast Ethiopia.** (DOCX)

## Acknowledgments

We acknowledge Ataye district hospital for the cooperation during this study by providing all the necessary information and support while we needed. We also acknowledge Wollo University for the technical support during the whole research activity. Moreover, we would also like to extend our special thanks to data collectors, supervisor, and the study participant for their valuable contribution and cooperation for the study.

## Author Contributions

**Conceptualization:** Daniel Gebretsadik, Nuru Ahmed, Edosa Kebede.

**Data curation:** Daniel Gebretsadik, Nuru Ahmed, Edosa Kebede, Saba Gebremicheal, Melaku Ashagrie Belete.

**Formal analysis:** Daniel Gebretsadik.

**Funding acquisition:** Saba Gebremicheal, Melaku Ashagrie Belete.

**Investigation:** Daniel Gebretsadik, Nuru Ahmed, Edosa Kebede.

**Methodology:** Daniel Gebretsadik, Nuru Ahmed, Edosa Kebede, Saba Gebremicheal.

**Project administration:** Daniel Gebretsadik, Melaku Ashagrie Belete.

**Resources:** Edosa Kebede, Saba Gebremicheal.

**Software:** Daniel Gebretsadik, Nuru Ahmed.

**Supervision:** Edosa Kebede, Saba Gebremicheal, Melaku Ashagrie Belete, Metadel Adane.

**Validation:** Daniel Gebretsadik, Saba Gebremicheal, Melaku Ashagrie Belete.

**Visualization:** Daniel Gebretsadik, Nuru Ahmed, Saba Gebremicheal, Melaku Ashagrie Belete.

**Writing – original draft:** Daniel Gebretsadik.

**Writing – review & editing:** Daniel Gebretsadik, Nuru Ahmed, Edosa Kebede, Saba Gebremicheal, Melaku Ashagrie Belete, Metadel Adane.

## References

1. Guan W-j, Ni Z-y, Hu Y, Liang W-h, Ou C-q, He J-x, et al. Clinical characteristics of coronavirus disease 2019 in China. *New England journal of medicine*. 2020; 382(18):1708–20.
2. Sohrabi C, Alsafi Z, O'Neill N, Khan M, Kerwan A, Al-Jabir A, et al. World Health Organization declares global emergency: A review of the 2019 novel coronavirus (COVID-19). *International Journal of Surgery*. 2020.
3. Chan JF-W, Yuan S, Kok K-H, To KK-W, Chu H, Yang J, et al. A familial cluster of pneumonia associated with the 2019 novel coronavirus indicating person-to-person transmission: a study of a family cluster. *The Lancet*. 2020; 395(10223):514–23. [https://doi.org/10.1016/S0140-6736\(20\)30154-9](https://doi.org/10.1016/S0140-6736(20)30154-9) PMID: 31986261
4. Li Q, Guan X, Wu P, Wang X, Zhou L, Tong Y, et al. Early transmission dynamics in Wuhan, China, of novel coronavirus-infected pneumonia. *New England Journal of Medicine*. 2020. <https://doi.org/10.1056/NEJMoa2001316> PMID: 31995857

5. Chen N, Zhou M, Dong X, Qu J, Gong F, Han Y, et al. Epidemiological and clinical characteristics of 99 cases of 2019 novel coronavirus pneumonia in Wuhan, China: a descriptive study. *The Lancet*. 2020; 395(10223):507–13. [https://doi.org/10.1016/S0140-6736\(20\)30211-7](https://doi.org/10.1016/S0140-6736(20)30211-7) PMID: 32007143
6. Holshue ML, DeBolt C, Lindquist S, Lofy KH, Wiesman J, Bruce H, et al. First case of 2019 novel coronavirus in the United States. *New England Journal of Medicine*. 2020.
7. Murthy S, Gomersall CD, Fowler RA. Care for critically ill patients with COVID-19. *Jama*. 2020; 323(15):1499–500. <https://doi.org/10.1001/jama.2020.3633> PMID: 32159735
8. Zhou F, Yu T, Du R, Fan G, Liu Y, Liu Z, et al. Clinical course and risk factors for mortality of adult inpatients with COVID-19 in Wuhan, China: a retrospective cohort study. *The Lancet*. 2020. [https://doi.org/10.1016/S0140-6736\(20\)30566-3](https://doi.org/10.1016/S0140-6736(20)30566-3) PMID: 32171076
9. Wu C, Chen X, Cai Y, Zhou X, Xu S, Huang H, et al. Risk factors associated with acute respiratory distress syndrome and death in patients with coronavirus disease 2019 pneumonia in Wuhan, China. *JAMA internal medicine*. 2020. <https://doi.org/10.1001/jamainternmed.2020.0994> PMID: 32167524
10. Riou J, Althaus CL. Pattern of early human-to-human transmission of Wuhan 2019 novel coronavirus (2019-nCoV), December 2019 to January 2020. *Eurosurveillance*. 2020; 25(4):2000058.
11. Huang C, Wang Y, Li X, Ren L, Zhao J, Hu Y, et al. Clinical features of patients infected with 2019 novel coronavirus in Wuhan, China. *The Lancet*. 2020; 395(10223):497–506.
12. Wang D, Hu B, Hu C, Zhu F, Liu X, Zhang J, et al. Clinical characteristics of 138 hospitalized patients with 2019 novel coronavirus-infected pneumonia in Wuhan, China. *Jama*. 2020; 323(11):1061–9. <https://doi.org/10.1001/jama.2020.1585> PMID: 32031570
13. Wu Z, McGoogan JM. Characteristics of and important lessons from the coronavirus disease 2019 (COVID-19) outbreak in China: summary of a report of 72 314 cases from the Chinese Center for Disease Control and Prevention. *Jama*. 2020; 323(13):1239–42. <https://doi.org/10.1001/jama.2020.2648> PMID: 32091533
14. Organization WH. Coronavirus disease (COVID-19). 2020.
15. Moore M, Gelfeld B, Adeyemi Okunogbe CP. Identifying future disease hot spots: infectious disease vulnerability index. *Rand health quarterly*. 2017; 6(3). PMID: 28845357
16. Kapata N, Ihekweazu C, Ntoumi F, Raji T, Chanda-Kapata P, Mwaba P, et al. Is Africa prepared for tackling the COVID-19 (SARS-CoV-2) epidemic. Lessons from past outbreaks, ongoing pan-African public health efforts, and implications for the future. *International Journal of Infectious Diseases*. 2020; 93:233–6. <https://doi.org/10.1016/j.ijid.2020.02.049> PMID: 32119980
17. WHO. First Case of COVID-19 Confirmed in ETHIOPIA. 2020 [cited 2020 August 15]. <https://www.afro.who.int/news/first-case-covid-19-confirmed-ethiopia>.
18. WHO. WHO Coronavirus Disease (COVID-19) Dashboard 2020 [cited 2020 October 20]. <https://covid19.who.int/>.
19. Tian X, Li C, Huang A, Xia S, Lu S, Shi Z, et al. Potent binding of 2019 novel coronavirus spike protein by a SARS coronavirus-specific human monoclonal antibody. *Emerging microbes & infections*. 2020; 9(1):382–5. <https://doi.org/10.1080/22221751.2020.1729069> PMID: 32065055
20. Bhattacharya M, Sharma AR, Patra P, Ghosh P, Sharma G, Patra BC, et al. Development of epitope-based peptide vaccine against novel coronavirus 2019 (SARS-CoV-2): Immunoinformatics approach. *Journal of medical virology*. 2020; 92(6):618–31. <https://doi.org/10.1002/jmv.25736> PMID: 32108359
21. Wang M, Cao R, Zhang L, Yang X, Liu J, Xu M, et al. Remdesivir and chloroquine effectively inhibit the recently emerged novel coronavirus (2019-nCoV) in vitro. *Cell research*. 2020; 30(3):269–71. <https://doi.org/10.1038/s41422-020-0282-0> PMID: 32020029
22. Zeng Y-M, Xu X-L, He X-Q, Tang S-Q, Li Y, Huang Y-Q, et al. Comparative effectiveness and safety of ribavirin plus interferon-alpha, lopinavir/ritonavir plus interferon-alpha, and ribavirin plus lopinavir/ritonavir plus interferon-alpha in patients with mild to moderate novel coronavirus disease 2019: study protocol. *Chinese medical journal*. 2020; 133(9):1132–4. <https://doi.org/10.1097/CM9.0000000000000790> PMID: 32149772
23. Heymann DL, Shindo N. COVID-19: what is next for public health? *The Lancet*. 2020; 395(10224):542–5. [https://doi.org/10.1016/S0140-6736\(20\)30374-3](https://doi.org/10.1016/S0140-6736(20)30374-3) PMID: 32061313
24. Nkengasong JN, Mankoula W. Looming threat of COVID-19 infection in Africa: act collectively, and fast. *The Lancet*. 2020; 395(10227):841–2.
25. Akalu Y, Ayelign B, Molla MD. Knowledge, attitude and practice towards COVID-19 among chronic disease patients at Addis Zemen Hospital, Northwest Ethiopia. *Infection and drug resistance*. 2020; 13:1949. <https://doi.org/10.2147/IDR.S258736> PMID: 32612371
26. Niu P, Lu R, Lan J, Liu G, Wang W, Tan W. Development of Novel Multiplex Real-time RT-PCR Assays for Detection of MERS-CoV Infection. *Bing du xue bao = Chinese journal of virology*. 2016; 32(3):349–54. PMID: 29963823



27. Yang W, Dang X, Wang Q, Xu M, Zhao Q, Zhou Y, et al. Rapid detection of SARS-CoV-2 using reverse transcription RT-LAMP method. medRxiv. 2020.
28. Paul A, Sikdar D, Hossain MM, Amin MR, Deeba F, Mahanta J, et al. Knowledge, attitudes, and practices toward the novel coronavirus among Bangladeshis: Implications for mitigation measures. PLoS one. 2020; 15(9):e0238492. <https://doi.org/10.1371/journal.pone.0238492> PMID: 32877449
29. Ramadan HK-A, Mahmoud MA, Aburahma MZ, Elkhawaga AA, El-Mokhtar MA, Sayed IM, et al. Predictors of Severity and Co-Infection Resistance Profile in COVID-19 Patients: First Report from Upper Egypt. Infection and Drug Resistance. 2020; 13:3409–22. <https://doi.org/10.2147/IDR.S272605> PMID: 33116660
30. Gudbjartsson DF, Helgason A, Jonsson H, Magnusson OT, Melsted P, Norddahl GL, et al. Spread of SARS-CoV-2 in the Icelandic population. New England Journal of Medicine. 2020.
31. Kebede Y, Yitayih Y, Birhanu Z, Mekonen S, Ambelu A. Knowledge, perceptions and preventive practices towards COVID-19 early in the outbreak among Jimma university medical center visitors, South-west Ethiopia. PLoS one. 2020; 15(5):e0233744. <https://doi.org/10.1371/journal.pone.0233744> PMID: 32437432
32. Park M, Cook AR, Lim JT, Sun Y, Dickens BL. A systematic review of COVID-19 epidemiology based on current evidence. Journal of Clinical Medicine. 2020; 9(4):967. <https://doi.org/10.3390/jcm9040967> PMID: 32244365
33. Reuben RC, Danladi MM, Saleh DA, Ejembi PE. Knowledge, attitudes and practices towards COVID-19: an epidemiological survey in North-Central Nigeria. Journal of community health. 2020:1–14.
34. Zhong B-L, Luo W, Li H-M, Zhang Q-Q, Liu X-G, Li W-T, et al. Knowledge, attitudes, and practices towards COVID-19 among Chinese residents during the rapid rise period of the COVID-19 outbreak: a quick online cross-sectional survey. International journal of biological sciences. 2020; 16(10):1745. <https://doi.org/10.7150/ijbs.45221> PMID: 32226294
35. Adela N, Nkengazong L, Ambe LA, Ebogo JT, Mba FM, Goni HO, et al. Knowledge, attitudes, practices of/towards COVID 19 preventive measures and symptoms: A cross-sectional study during the exponential rise of the outbreak in Cameroon. PLoS neglected tropical diseases. 2020; 14(9):e0008700. <https://doi.org/10.1371/journal.pntd.0008700> PMID: 32886678
36. Adhikari SP, Meng S, Wu Y-J, Mao Y-P, Ye R-X, Wang Q-Z, et al. Epidemiology, causes, clinical manifestation and diagnosis, prevention and control of coronavirus disease (COVID-19) during the early outbreak period: a scoping review. Infectious diseases of poverty. 2020; 9(1):1–12.
37. Asemahagn MA. Factors determining the knowledge and prevention practice of healthcare workers towards COVID-19 in Amhara region, Ethiopia: a cross-sectional survey. Tropical medicine and health. 2020; 48(1):1–11. <https://doi.org/10.1186/s41182-020-00254-3> PMID: 32839649
38. Verma A, Mehta S, Mehta A, Patyal A. Knowledge, attitude and practices toward health behavior and cardiovascular disease risk factors among the patients of metabolic syndrome in a teaching hospital in India. Journal of family medicine and primary care. 2019; 8(1):178. [https://doi.org/10.4103/jfmpc.jfmpc\\_257\\_18](https://doi.org/10.4103/jfmpc.jfmpc_257_18) PMID: 30911502
39. Al-Turkstani AHM, Alkail BA, Hegazy AA, Asiri SI. Knowledge, attitude, and practice among primary health-care physicians toward smoking cessation in Makkah, Saudi Arabia. Int J Med Sci Public Health. 2016; 5(7):1–11.
40. Hossain MA, Jahid MIK, Hossain KMA, Walton LM, Uddin Z, Haque MO, et al. Knowledge, attitudes, and fear of COVID-19 during the Rapid Rise Period in Bangladesh. PLoS one. 2020; 15(9):e0239646. <https://doi.org/10.1371/journal.pone.0239646> PMID: 32970769
41. Taghrir MH, Borazjani R, Shiraly R. COVID-19 and Iranian Medical Students; A Survey on Their Related-Knowledge, Preventive Behaviors and Risk Perception. Archives of Iranian medicine. 2020; 23(4):249–54. <https://doi.org/10.34172/aim.2020.06> PMID: 32271598
42. Li S, Feng B, Liao W, Pan W. Internet use, risk awareness, and demographic characteristics associated with engagement in preventive behaviors and testing: cross-sectional survey on COVID-19 in the United States. Journal of medical Internet research. 2020; 22(6):e19782. <https://doi.org/10.2196/19782> PMID: 32501801
43. Clements JM. Knowledge and Behaviors Toward COVID-19 Among US Residents During the Early Days of the Pandemic: Cross-Sectional Online Questionnaire. JMIR Public Health and Surveillance. 2020; 6(2):e19161. <https://doi.org/10.2196/19161> PMID: 32369759
44. Zhao D, Wang M, Wang M, Zhao Y, Zheng Z, Li X, et al. Asymptomatic infection by SARS-CoV-2 in healthcare workers: A study in a large teaching hospital in Wuhan, China. International Journal of Infectious Diseases. 2020; 99:219–25. <https://doi.org/10.1016/j.ijid.2020.07.082> PMID: 32758693



45. Snoeck CJ, Vaillant M, Abdelrahman T, Satagopam VP, Turner JD, Beaumont K, et al. Prevalence of SARS-CoV-2 infection in the Luxembourgish population: the CON-VINCE study. medRxiv. 2020.
46. Vodičar PM, Valenčak AO, Zupan B, Županc TA, Kurdija S, Korva M, et al. Low prevalence of active COVID-19 in Slovenia: a nationwide population study of a probability-based sample. Clinical Microbiology and Infection. 2020.
